# Supplementary material for: Identification of valid reference genes for mRNA and microRNA normalisation in prostate cancer cell lines
Source: PubMed Central journal article supplement (PMC5792445; doi:10.1038/s41598-018-19458-z), 2018-01-31
Supplement: 41598_2018_19458_MOESM1_ESM.pdf [file 41598_2018_19458_MOESM1_ESM.pdf]

# Identification of valid reference genes for mRNA and microRNA normalisation in prostate cancer cell lines

Hui Zhao<sup>1,2#</sup>, Teng-Fei Ma<sup>1,3#</sup>, Jie Lin<sup>3#</sup>, Lin-Lin Liu<sup>1,3</sup>, Wei-Jie Sun<sup>1,3</sup>, Li-Xia Guo<sup>1,3</sup>, Si-Qi Wang<sup>1,3</sup>,  
Newton O. Otecko<sup>4,5</sup>, Ya-Ping Zhang<sup>1,4\*</sup>

## Supporting Information

**Figure S1. Melting peaks of all primer pairs.** The specificity of all the primer pairs was confirmed by a single peak in the melting curve.

**Figure S2. Relative expression of *PCA3* normalised by different reference genes and their combinations.** Fold change in *PCA3* expression of LNCaP cells subjected to different DHT treatments. Stable reference genes *YWHAZ*, *ACTB*, their combination, and least stable reference genes *SDHA* and *ALAS1* were independently used for normalisation. Bars indicate +SD evaluated from three biological replicates. \* and \*\* indicate  $P < 0.05$  and  $P < 0.01$ , respectively.

**Figure S3. Full-length unadjusted images of Western blots shown in Figure 1.**

**Table S1. Information on mRNA and npcRNA reference genes used in this study.** \* indicates *Homo sapiens* unplaced genomic contig, GRCh37.p5.

| <b>Gene symbol</b> | <b>Gene name/RNA Species</b>               | <b>Chromosomal Localisation</b> | <b>Molecular function</b>                                                |
|--------------------|--------------------------------------------|---------------------------------|--------------------------------------------------------------------------|
| <i>18S rRNA</i>    | 18S ribosomal RNA                          | ChrUn*                          | Ribosome subunit, translation                                            |
| <i>ACTB</i>        | $\beta$ -Actin                             | 7p22-p12                        | Cytoskeleton                                                             |
| <i>ALAS1</i>       | aminolevulinate, delta-, synthase 1        | 3p21.1                          | Heme synthesis                                                           |
| <i>GAPDH</i>       | Glyceraldehyde-3-phosphate dehydrogenase   | 12p13.31                        | Glycolysis                                                               |
| <i>HPRT1</i>       | Hypoxanthine phosphoribosyl-transferase 1  | Xq26.1                          | Generation of purine nucleotides                                         |
| <i>K-ALPHA-1</i>   | K-alpha-1 tubulin, alpha, ubiquitous       | 12q13.12                        | Structural constituent of cytoskeleton                                   |
| <i>RPL13A</i>      | Ribosomal protein L13a                     | 19q13.3                         | Catalyze protein synthesis                                               |
| <i>SDHA</i>        | Succinate dehydrogenase complex, subunit A | 5p15                            | Glycolysis                                                               |
| <i>TBP</i>         | TATA box binding protein                   | 6q27                            | Transcription initiation                                                 |
| <i>YWHAZ</i>       | Tyrosine 3-monooxygenase                   | 8q23.1                          | Signal transduction                                                      |
| <i>miR-16</i>      | miRNA                                      | 13q14.2                         | Negative regulation in chronic lymphocytic leukemia                      |
| <i>miR-130b</i>    | miRNA                                      | 22q11.21                        | Gene expression regulation in cell growth and cell invasion              |
| <i>miR-1225-3p</i> | miRNA                                      | 16p13.3                         | Gene expression regulation in stem cell self-renewal and differentiation |
| <i>miR-1228-3p</i> | miRNA                                      | 12q13.3                         | Cellular development and lipid Metabolism                                |
| <i>RNU6-2</i>      | snoRNA*                                    | 19p13.3                         | Cellular RNAs modification                                               |
| <i>RNU43</i>       | snoRNA                                     | 22q13.1                         | Ribosomal RNA modification                                               |

**Table S2. Quantity and integrity of total RNA in this study.**

|        | Treatment I |                      |         |         |     | Treatment II         |         |         |     |
|--------|-------------|----------------------|---------|---------|-----|----------------------|---------|---------|-----|
|        | DHT<br>(nM) | RNA conc.<br>(ng/ul) | 260/280 | 260/230 | RIN | RNA conc.<br>(ng/ul) | 260/280 | 260/230 | RIN |
| RWPE-1 | 0           | 760                  | 2.08    | 1.46    | 10  | 712                  | 2.06    | 2.11    | 10  |
|        | 1           | 692                  | 2.09    | 1.66    | 9.9 | 628                  | 2.09    | 1.47    | 10  |
|        | 10          | 716                  | 2.06    | 2.12    | 10  | 733                  | 2.10    | 1.59    | 10  |
|        | 100         | 653                  | 2.08    | 1.42    | 10  | 688                  | 2.10    | 1.52    | 9.8 |
|        | 1000        | 630                  | 2.08    | 1.85    | 10  | 627                  | 2.09    | 1.48    | 10  |
| LNCaP  | 0           | 506                  | 2.05    | 2.09    | 9.9 | 519                  | 2.02    | 1.56    | 9.8 |
|        | 1           | 536                  | 2.07    | 1.41    | 9.8 | 454                  | 2.04    | 1.89    | 9.9 |
|        | 10          | 559                  | 2.06    | 2.00    | 9.7 | 488                  | 2.02    | 1.93    | 10  |
|        | 100         | 576                  | 2.08    | 1.66    | 9.8 | 455                  | 2.05    | 1.53    | 9.6 |
|        | 1000        | 582                  | 2.08    | 2.04    | 9.9 | 410                  | 2.05    | 1.90    | 9.7 |
| DU145  | 0           | 432                  | 2.06    | 1.91    | 10  | 390                  | 2.10    | 0.92    | 9.6 |
|        | 1           | 487                  | 2.05    | 1.58    | 9.7 | 356                  | 2.09    | 1.42    | 9.8 |
|        | 10          | 420                  | 2.05    | 2.05    | 9.6 | 375                  | 2.08    | 1.90    | 9.9 |
|        | 100         | 402                  | 2.07    | 2.04    | 9.7 | 364                  | 2.08    | 2.05    | 9.6 |
|        | 1000        | 516                  | 2.02    | 1.90    | 9.8 | 359                  | 2.08    | 1.82    | 9.5 |
| 22RV1  | 0           | 503                  | 2.08    | 1.98    | 10  | 423                  | 2.10    | 2.03    | 10  |
|        | 1           | 447                  | 2.11    | 1.80    | 9.4 | 446                  | 2.09    | 1.81    | 9.9 |
|        | 10          | 460                  | 2.10    | 1.58    | 9.8 | 403                  | 2.10    | 1.80    | 9.9 |
|        | 100         | 483                  | 2.08    | 1.60    | 10  | 438                  | 2.09    | 2.06    | 9.8 |
|        | 1000        | 476                  | 2.09    | 1.73    | 9.7 | 457                  | 2.09    | 1.57    | 10  |
| PC-3   | 0           | 301                  | 2.11    | 0.93    | 10  | 290                  | 2.13    | 1.51    | 9.8 |
|        | 1           | 288                  | 2.10    | 1.42    | 10  | 349                  | 2.08    | 1.53    | 9.7 |
|        | 10          | 364                  | 2.09    | 2.09    | 9.9 | 364                  | 2.09    | 1.88    | 9.7 |
|        | 100         | 333                  | 2.10    | 2.10    | 9.7 | 323                  | 2.10    | 1.34    | 9.6 |
|        | 1000        | 266                  | 2.08    | 2.08    | 9.6 | 301                  | 2.10    | 1.68    | 9.5 |

**Table S3. Ranking of candidate reference genes calculated by NormFinder based on their expression stability values.**

| Rank | 0 nM               |      | 1 nM               |      | 10 nM              |      | 100 nM             |      | 1000 nM            |      | Total samples      |      |
|------|--------------------|------|--------------------|------|--------------------|------|--------------------|------|--------------------|------|--------------------|------|
|      | gene               | SV   | gene               | SV   | gene               | SV   | gene               | SV   | gene               | SV   | gene               | SV   |
| 1    | <i>GAPDH</i>       | 0.13 | <i>ACTB</i>        | 0.06 | <i>GAPDH</i>       | 0.06 | <i>ACTB</i>        | 0.07 | <i>ACTB</i>        | 0.03 | <i>ACTB</i>        | 0.08 |
| 2    | <i>ACTB</i>        | 0.14 | <i>GAPDH</i>       | 0.13 | <i>ACTB</i>        | 0.09 | <i>GAPDH</i>       | 0.11 | <i>GAPDH</i>       | 0.09 | <i>GAPDH</i>       | 0.09 |
| 3    | <i>TBP</i>         | 0.15 | <i>TBP</i>         | 0.14 | <i>TBP</i>         | 0.21 | <i>18S rRNA</i>    | 0.17 | <i>TBP</i>         | 0.24 | <i>TBP</i>         | 0.18 |
| 4    | <i>HPRT1</i>       | 0.25 | <i>HPRT1</i>       | 0.25 | <i>RPL13A</i>      | 0.27 | <i>K-ALPHA-1</i>   | 0.21 | <i>ALAS1</i>       | 0.29 | <i>HPRT1</i>       | 0.26 |
| 5    | <i>SDHA</i>        | 0.29 | <i>SDHA</i>        | 0.27 | <i>SDHA</i>        | 0.27 | <i>TBP</i>         | 0.23 | <i>HPRT1</i>       | 0.29 | <i>SDHA</i>        | 0.27 |
| 6    | <i>RPL13A</i>      | 0.34 | <i>RPL13A</i>      | 0.30 | <i>HPRT1</i>       | 0.28 | <i>RPL13A</i>      | 0.28 | <i>YWHAZ</i>       | 0.30 | <i>RPL13A</i>      | 0.27 |
| 7    | <i>K-ALPHA-1</i>   | 0.35 | <i>K-ALPHA-1</i>   | 0.32 | <i>K-ALPHA-1</i>   | 0.29 | <i>SDHA</i>        | 0.29 | <i>RPL13A</i>      | 0.31 | <i>K-ALPHA-1</i>   | 0.28 |
| 8    | <i>18S rRNA</i>    | 0.35 | <i>YWHAZ</i>       | 0.32 | <i>YWHAZ</i>       | 0.31 | <i>YWHAZ</i>       | 0.29 | <i>K-ALPHA-1</i>   | 0.32 | <i>18S rRNA</i>    | 0.29 |
| 9    | <i>ALAS1</i>       | 0.38 | <i>ALAS1</i>       | 0.32 | <i>18S rRNA</i>    | 0.32 | <i>HPRT1</i>       | 0.33 | <i>18S rRNA</i>    | 0.33 | <i>YWHAZ</i>       | 0.30 |
| 10   | <i>YWHAZ</i>       | 0.39 | <i>18S rRNA</i>    | 0.38 | <i>ALAS1</i>       | 0.33 | <i>ALAS1</i>       | 0.33 | <i>SDHA</i>        | 0.33 | <i>ALAS1</i>       | 0.30 |
| 1    | <i>miR-1228-3p</i> | 0.20 | <i>miR-16</i>      | 0.14 | <i>miR-1228-3p</i> | 0.10 | <i>miR-1225-3p</i> | 0.12 | <i>miR-1225-3p</i> | 0.11 | <i>miR-1225-3p</i> | 0.13 |
| 2    | <i>miR-1225-3p</i> | 0.22 | <i>miR-1225-3p</i> | 0.22 | <i>miR-1225-3p</i> | 0.12 | <i>miR-16</i>      | 0.13 | <i>miR-16</i>      | 0.20 | <i>miR-16</i>      | 0.26 |
| 3    | <i>RNU6-2</i>      | 0.28 | <i>miR-130b</i>    | 0.33 | <i>RNU6-2</i>      | 0.27 | <i>miR-130b</i>    | 0.13 | <i>miR-130b</i>    | 0.38 | <i>miR-1228-3p</i> | 0.31 |
| 4    | <i>miR-16</i>      | 0.31 | <i>RNU43</i>       | 0.36 | <i>miR-130b</i>    | 0.42 | <i>miR-1228-3p</i> | 0.44 | <i>RNU43</i>       | 0.43 | <i>miR-130b</i>    | 0.35 |
| 5    | <i>RNU43</i>       | 0.40 | <i>miR-1228-3p</i> | 0.37 | <i>miR-16</i>      | 0.44 | <i>RNU43</i>       | 0.51 | <i>miR-1228-3p</i> | 0.46 | <i>RNU43</i>       | 0.41 |
| 6    | <i>miR-130b</i>    | 0.42 | <i>RNU6-2</i>      | 0.55 | <i>RNU43</i>       | 0.45 | <i>RNU6-2</i>      | 0.59 | <i>RNU6-2</i>      | 0.61 | <i>RNU6-2</i>      | 0.44 |

**Table S4. Ranking of candidate reference genes calculated by BestKeeper based on their standard deviation.**

| Rank | 0 nM               |      | 1 nM               |      | 10 nM              |      | 100 nM             |      | 1000 nM            |      | Total samples      |      |
|------|--------------------|------|--------------------|------|--------------------|------|--------------------|------|--------------------|------|--------------------|------|
|      | gene               | SD   | gene               | SD   | gene               | SD   | gene               | SD   | gene               | SD   | gene               | SD   |
| 1    | <i>ACTB</i>        | 0.23 | <i>ACTB</i>        | 0.16 | <i>ACTB</i>        | 0.17 | <i>ACTB</i>        | 0.12 | <i>ACTB</i>        | 0.15 | <i>ACTB</i>        | 0.17 |
| 2    | <i>GAPDH</i>       | 0.25 | <i>GAPDH</i>       | 0.22 | <i>YWHAZ</i>       | 0.19 | <i>18S rRNA</i>    | 0.16 | <i>YWHAZ</i>       | 0.20 | <i>YWHAZ</i>       | 0.23 |
| 3    | <i>TBP</i>         | 0.29 | <i>YWHAZ</i>       | 0.23 | <i>RPL13A</i>      | 0.19 | <i>GAPDH</i>       | 0.21 | <i>RPL13A</i>      | 0.22 | <i>RPL13A</i>      | 0.24 |
| 4    | <i>RPL13A</i>      | 0.30 | <i>RPL13A</i>      | 0.25 | <i>GAPDH</i>       | 0.24 | <i>YWHAZ</i>       | 0.22 | <i>ALAS1</i>       | 0.25 | <i>GAPDH</i>       | 0.25 |
| 5    | <i>YWHAZ</i>       | 0.32 | <i>TBP</i>         | 0.26 | <i>ALAS1</i>       | 0.32 | <i>RPL13A</i>      | 0.25 | <i>18S rRNA</i>    | 0.29 | <i>18S rRNA</i>    | 0.30 |
| 6    | <i>18S rRNA</i>    | 0.33 | <i>ALAS1</i>       | 0.31 | <i>18S rRNA</i>    | 0.34 | <i>K-ALPHA-1</i>   | 0.30 | <i>GAPDH</i>       | 0.31 | <i>ALAS1</i>       | 0.31 |
| 7    | <i>ALAS1</i>       | 0.34 | <i>SDHA</i>        | 0.32 | <i>SDHA</i>        | 0.34 | <i>SDHA</i>        | 0.32 | <i>TBP</i>         | 0.39 | <i>TBP</i>         | 0.33 |
| 8    | <i>SDHA</i>        | 0.36 | <i>18S rRNA</i>    | 0.39 | <i>TBP</i>         | 0.38 | <i>ALAS1</i>       | 0.32 | <i>SDHA</i>        | 0.43 | <i>SDHA</i>        | 0.35 |
| 9    | <i>HPRT1</i>       | 0.39 | <i>K-ALPHA-1</i>   | 0.43 | <i>K-ALPHA-1</i>   | 0.45 | <i>TBP</i>         | 0.33 | <i>K-ALPHA-1</i>   | 0.47 | <i>K-ALPHA-1</i>   | 0.42 |
| 10   | <i>K-ALPHA-1</i>   | 0.44 | <i>HPRT1</i>       | 0.45 | <i>HPRT1</i>       | 0.49 | <i>HPRT1</i>       | 0.48 | <i>HPRT1</i>       | 0.48 | <i>HPRT1</i>       | 0.46 |
| 1    | <i>miR-16</i>      | 0.31 | <i>miR-16</i>      | 0.19 | <i>miR-1228-3p</i> | 0.09 | <i>miR-1225-3p</i> | 0.22 | <i>miR-16</i>      | 0.19 | <i>miR-16</i>      | 0.29 |
| 2    | <i>miR-1228-3p</i> | 0.36 | <i>miR-1225-3p</i> | 0.28 | <i>RNU43</i>       | 0.29 | <i>miR-16</i>      | 0.33 | <i>miR-1225-3p</i> | 0.25 | <i>miR-1228-3p</i> | 0.32 |
| 3    | <i>RNU43</i>       | 0.42 | <i>miR-1228-3p</i> | 0.32 | <i>miR-1225-3p</i> | 0.30 | <i>miR-1228-3p</i> | 0.38 | <i>miR-1228-3p</i> | 0.38 | <i>miR-1225-3p</i> | 0.32 |
| 4    | <i>miR-130b</i>    | 0.45 | <i>miR-130b</i>    | 0.43 | <i>miR-16</i>      | 0.40 | <i>miR-130b</i>    | 0.41 | <i>miR-130b</i>    | 0.44 | <i>RNU43</i>       | 0.53 |
| 5    | <i>miR-1225-3p</i> | 0.47 | <i>RNU43</i>       | 0.45 | <i>RNU6-2</i>      | 0.56 | <i>RNU43</i>       | 0.59 | <i>RNU6-2</i>      | 0.63 | <i>miR-130b</i>    | 0.54 |
| 6    | <i>RNU6-2</i>      | 0.50 | <i>RNU6-2</i>      | 0.56 | <i>miR-130b</i>    | 0.68 | <i>RNU6-2</i>      | 0.82 | <i>RNU43</i>       | 0.64 | <i>RNU6-2</i>      | 0.63 |

**Table S5. Information on primers for amplification mRNA reference genes and target gene.** \*Not available.

| <b>Gene</b>      | <b>Forward and Reverse Primer</b> | <b>Primer concentration (nM)</b> | <b>Product (bp)</b> | <b>Intron spanning</b> | <b>Reference</b> |
|------------------|-----------------------------------|----------------------------------|---------------------|------------------------|------------------|
| <i>18S rRNA</i>  | GGATGTAAAGGATGGAAAATACA           | 50                               | 72                  | NA*                    | [1]              |
|                  | TCCAGGTCTTCACGGAGCTTGTT           | 50                               |                     |                        |                  |
| <i>ACTB</i>      | TGACGTGGACATCCGCAAAG              | 50                               | 205                 | Yes                    | [1]              |
|                  | CTGGAAGGTGGACAGCGAGG              | 50                               |                     |                        |                  |
| <i>ALAS1</i>     | AGTGTGAAAACCGATGGAGG              | 200                              | 140                 | Yes                    | [2]              |
|                  | CGATCATACTGAAAAGTGGAAACAG         | 200                              |                     |                        |                  |
| <i>GAPDH</i>     | GACAGTCAGCCGCATCTTCT              | 50                               | 127                 | Yes                    | [1]              |
|                  | TTAAAAGCAGCCCTGGTGAC              | 50                               |                     |                        |                  |
| <i>HPRT1</i>     | GACCAGTCAACAGGGGACAT              | 50                               | 132                 | Yes                    | [3]              |
|                  | CCTGACCAAGGAAAGCAAAG              | 50                               |                     |                        |                  |
| <i>K-ALPHA-1</i> | TGGAACCCACAGTCATTGATGA            | 200                              | 135                 | Yes                    | [4]              |
|                  | TGATCTCCTTGCCAATGGTGTA            | 200                              |                     |                        |                  |
| <i>RPL13A</i>    | CGGACCGTGCGAGGTAT                 | 200                              | 114                 | Yes                    | [4]              |
|                  | CACCATCCGCTTTTTCTTGTC             | 200                              |                     |                        |                  |
| <i>SDHA</i>      | TGGTTGTCTTTGGTCGGG                | 50                               | 85                  | Yes                    | [5]              |
|                  | GCGTTTGGTTTAATTGGAGGG             | 50                               |                     |                        |                  |
| <i>TBP</i>       | GAGAGTTCTGGGATTGTACCG             | 200                              | 143                 | Yes                    | [5]              |
|                  | ATCCTCATGATTACCGCAGC              | 200                              |                     |                        |                  |
| <i>YWHAZ</i>     | ATGCAACCAACACATCCTATC             | 50                               | 178                 | Yes                    | [6]              |
|                  | GCATTATTAGCGTGCTGTCTT             | 50                               |                     |                        |                  |

**18S rRNA**

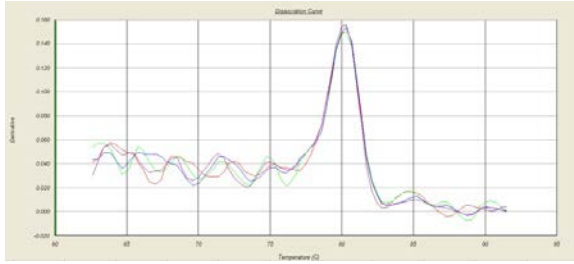

**ACTB**

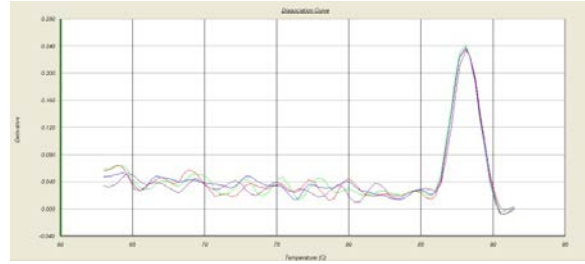

**ALAS1**

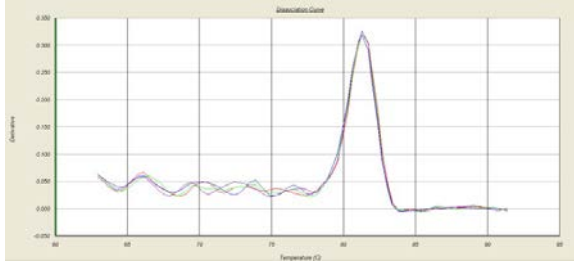

**GAPDH**

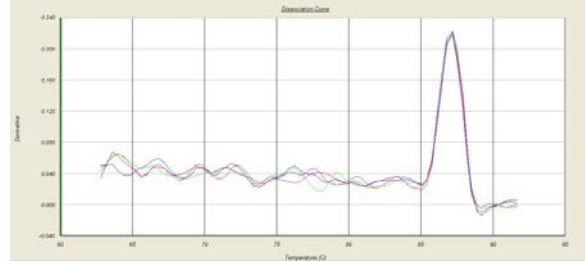

**HPRT1**

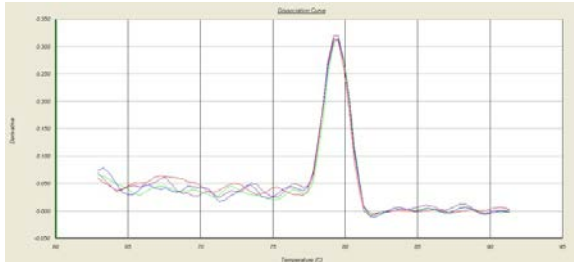

**K-ALPHA-1**

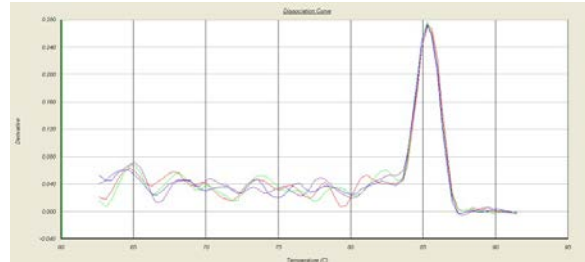

**RPL13A**

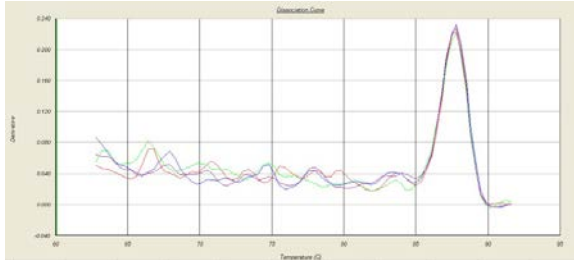

**SDHA**

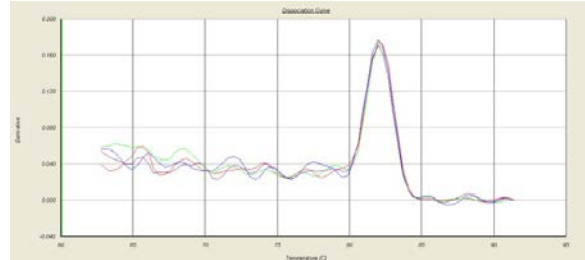

**TBP**

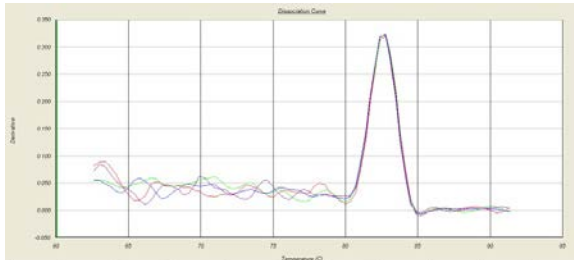

**YWHAZ**

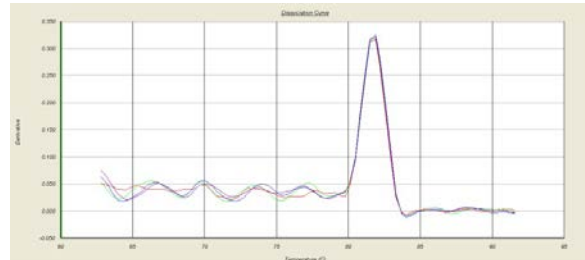

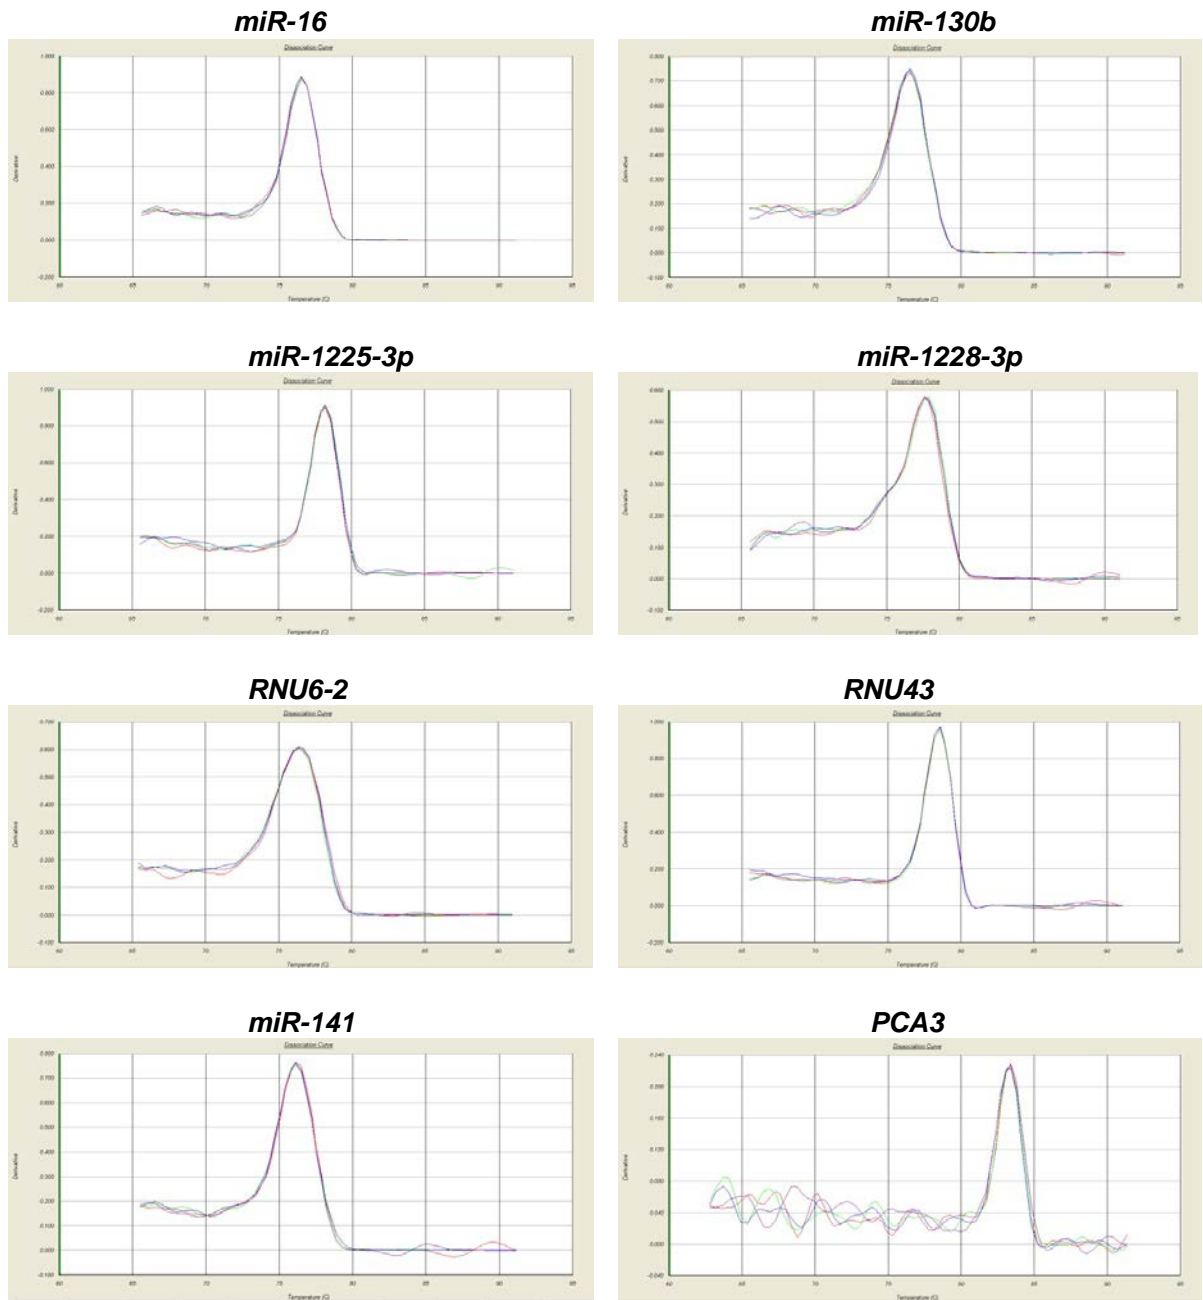

**Fig. S1**



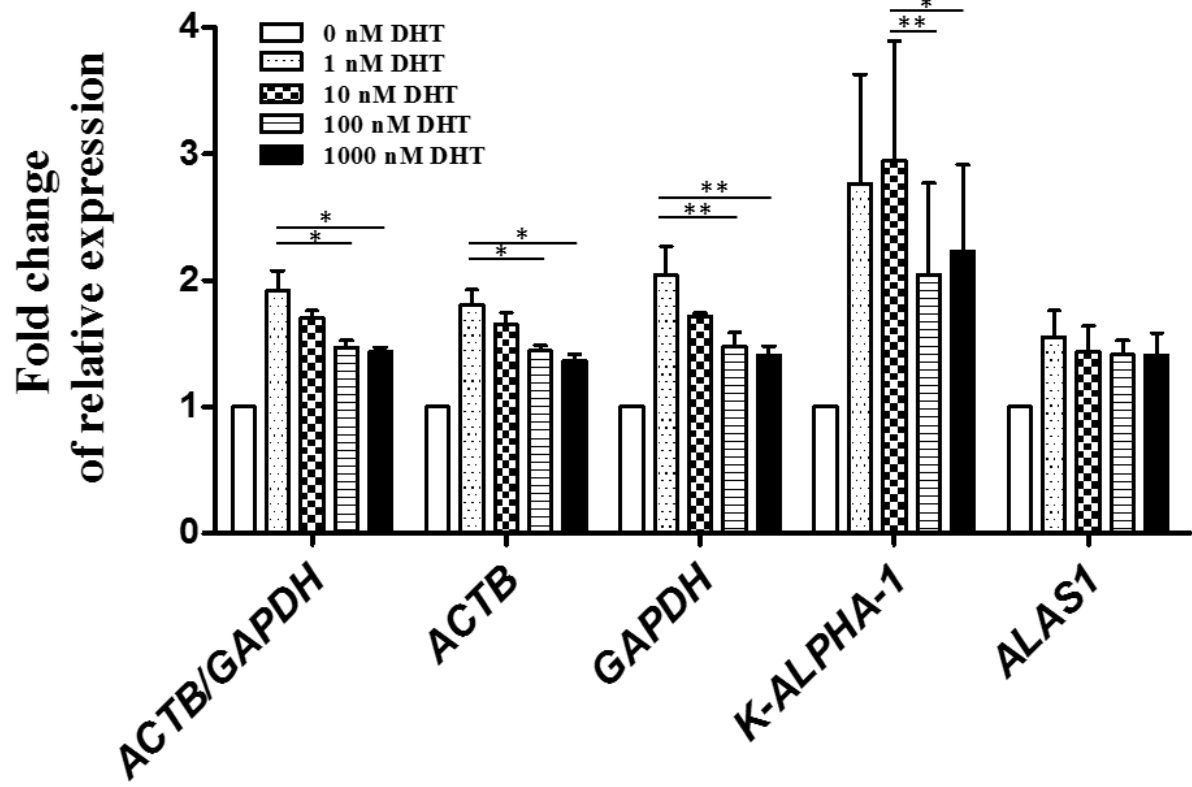

Fig. S2

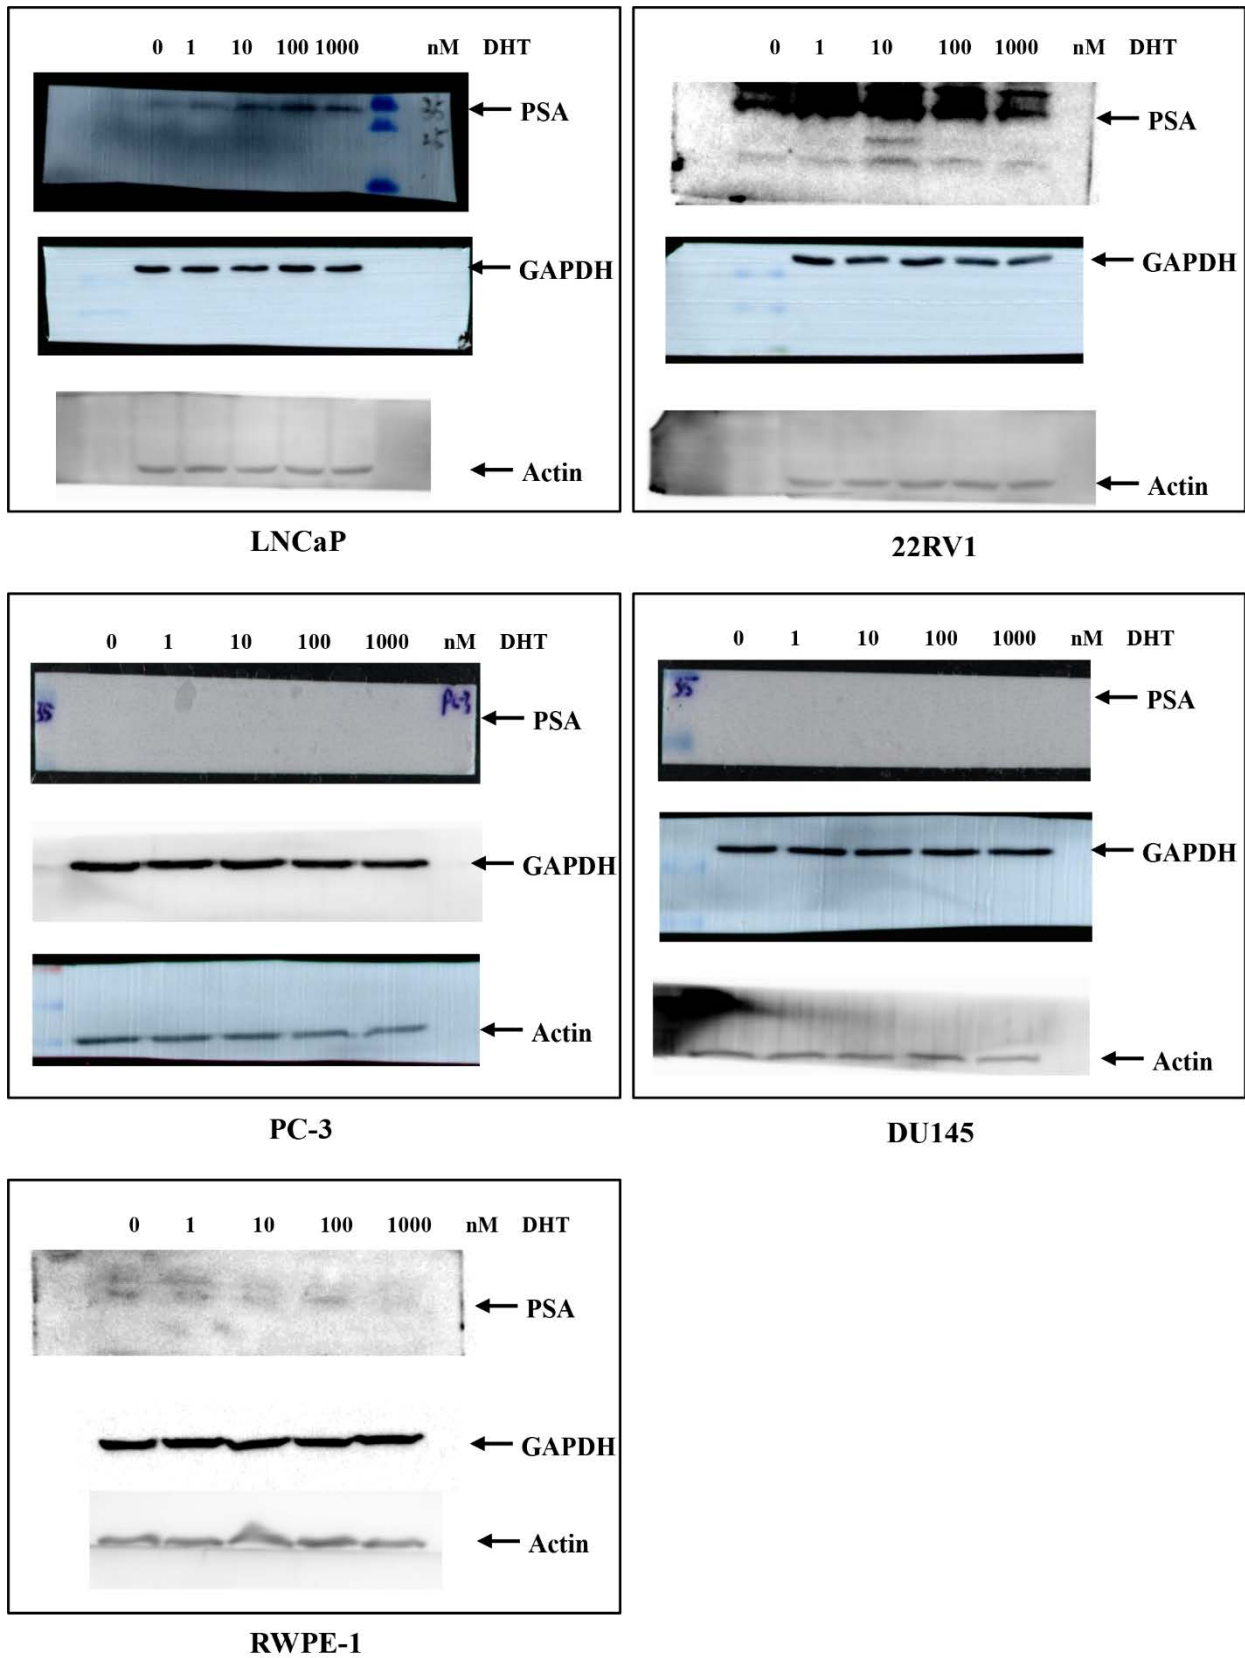

Fig. S3

## Supplementary References

1. Liu, L. L. *et al.* Identification of valid reference genes for the normalization of RT-qPCR expression studies in human breast cancer cell lines treated with and without transient transfection. *PLoS One.* **10**, e0117058 (2015).
2. Souza, A. F., Brum, I. S., Neto, B.S., Berger, M. & Branchini, G. Reference gene for primary culture of prostate cancer cells. *Mol. Biol. Rep.* **40(4)**, 2955-2962 (2013).
3. Li, Y. L., Ye, F., Hu, Y., Lu, W. G. & Xie, X. Identification of suitable reference genes for gene expression studies of human serous ovarian cancer by real-time polymerase chain reaction. *Anal. Biochem.* **394(1)**, 110-116 (2009).
4. Ohl, F. *et al.* Gene expression studies in prostate cancer tissue: which reference gene should be selected for normalization? *J. Mol. Med. (Berl)*. **83(12)**, 1014-1024 (2005).
5. Ceelen, L. *et al.* Critical selection of reliable reference genes for gene expression study in the HepaRG cell line. *Biochem. Pharmacol.* **81(10)**, 1255-1261(2011).
6. De Spiegelaere, W. *et al.* Elimination of amplification artifacts in real-time reverse transcription PCR using laser capture microdissected samples. *Anal. Biochem.* **382(1)**, 72-74 (2008).
